# Supplementary material for: Climate Change Induces Shifts in Abundance and Activity Pattern of Bacteria and Archaea Catalyzing Major Transformation Steps in Nitrogen Turnover in a Soil from a Mid-European Beech Forest
Source: PubMed Central journal article supplement (PMC4252137; doi:10.1371/journal.pone.0114278), 2014-12-02
Supplement: pone.0114278.s001.pdf [file pone.0114278.s001.pdf]

■ NW  
 ■ SW

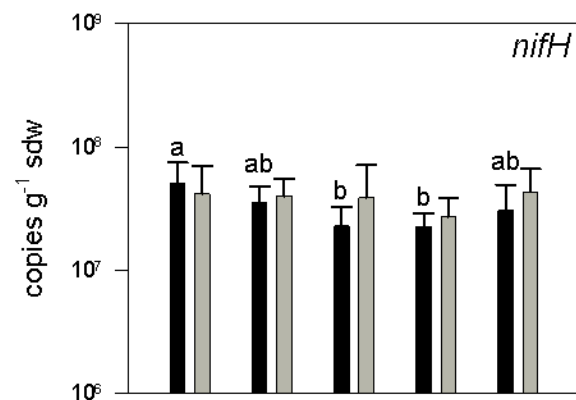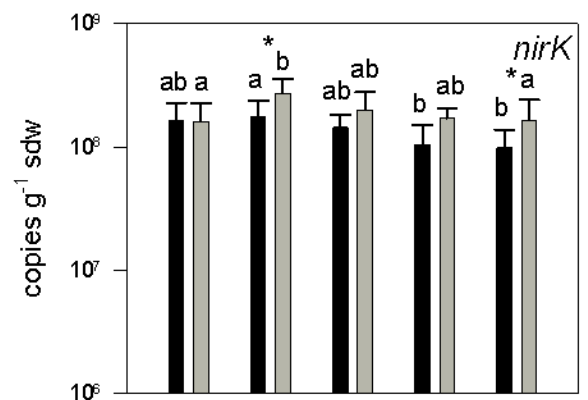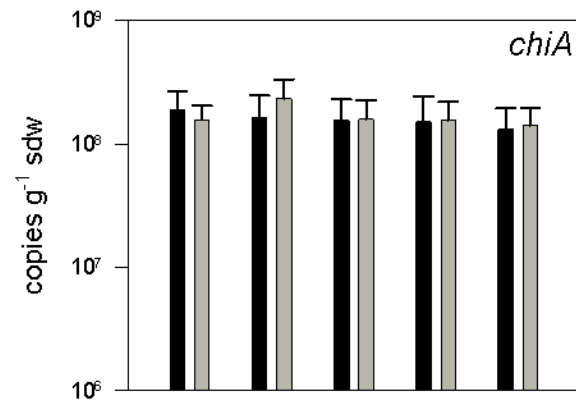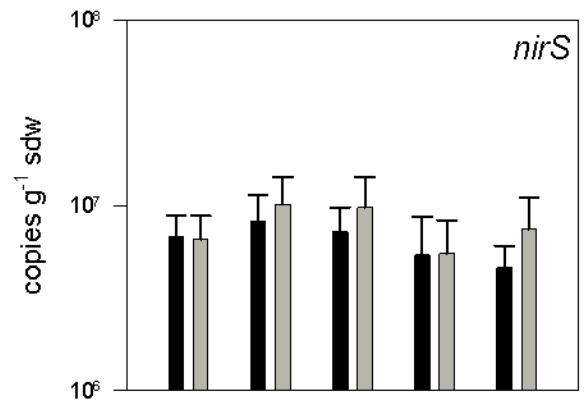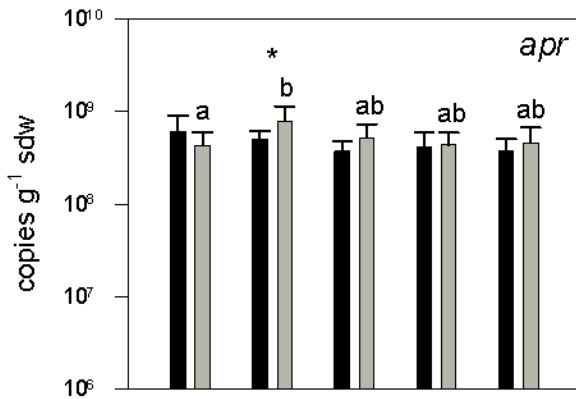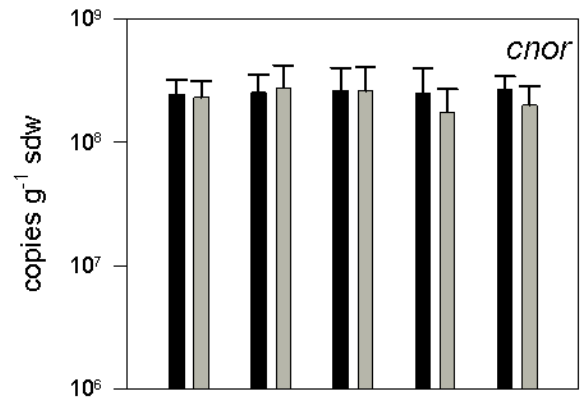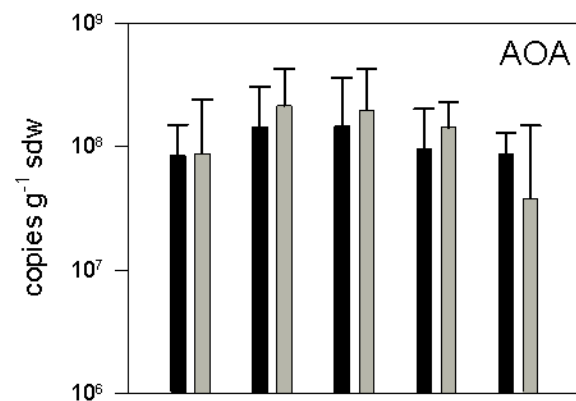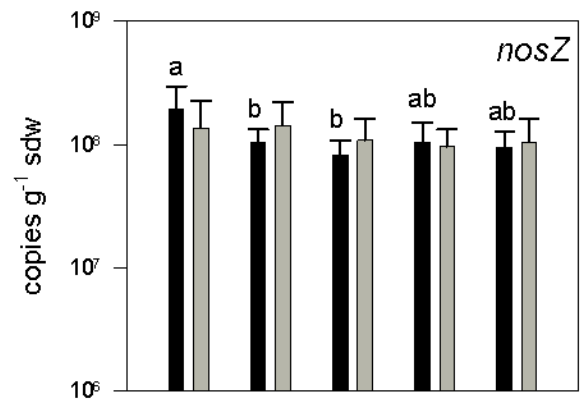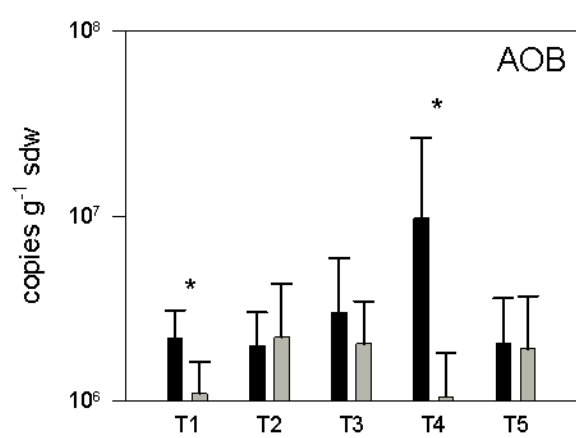

T1 22.06. T2 02.08. T3 06.08. T4 08.08. T5 27.09.

roof at SW  
 27.06. rewetting 05.08. 09.08.
